# Supplementary material
Source: Springer Nature journal article supplement (https://www.springermedizin.de/resource/supplementary/12891_2010_896_MOESM6_ESM.pdf/9506658)

# Response with pregabalin 450 mg

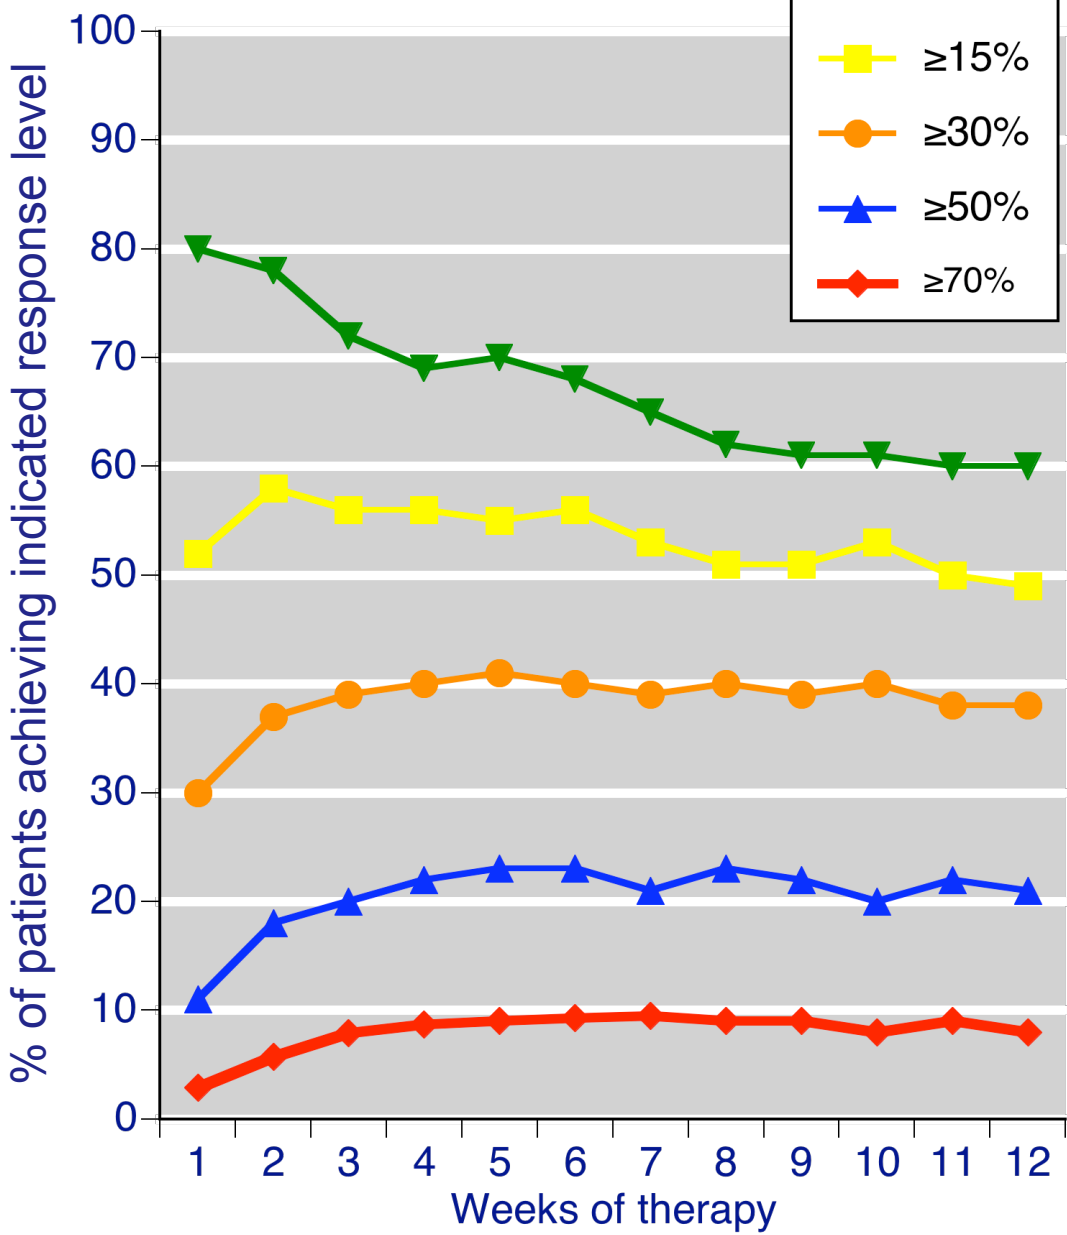

Supplement: MOESM6 [file 9506658]
